# Supplementary material for: Recent global decline in rainfall interception loss due to altered rainfall regimes
Source: Springer Nature journal article supplement (doi:10.1038/s41467-022-35414-y), 2022-12-10
Supplement: MOESM1 [file 41467_2022_35414_MOESM1_ESM.pdf]

## **Supplementary Information for**

# **Recent global decline in rainfall interception loss due to altered rainfall regimes**

by Xu Lian et al.

This PDF file contains:

Supplementary Tables 1-2

Supplementary Figures 1-11

**Supplementary Table 1. Canopy interception schemes in TRENDY land surface models.**

Commonly used abbreviations:  $P$  precipitation,  $L$  leaf area index,  $f_v$ , vegetative fractional cover, NA not available.

| Model name                                                                  | Model name abbreviation | $E_i$ parameterization                                                                                                                                                                                                                                                                                                                                                                                                   |
|-----------------------------------------------------------------------------|-------------------------|--------------------------------------------------------------------------------------------------------------------------------------------------------------------------------------------------------------------------------------------------------------------------------------------------------------------------------------------------------------------------------------------------------------------------|
| Community Atmosphere Biosphere Land Exchange - Populations-Order-Physiology | CABLE-POP               | Determined by $L$ and $canst1$<br>$canst1$ : max intercepted water by canopy                                                                                                                                                                                                                                                                                                                                             |
| Community Land Model version 5.0                                            | CLM5.0                  | $E_i = P\alpha \tanh(L + S)$<br>$L, S$ : exposed leaf and stem area;<br>$\alpha$ : the fractional area of a leaf that collects water.                                                                                                                                                                                                                                                                                    |
| Integrated Science Assessment Model                                         | ISAM                    | NA                                                                                                                                                                                                                                                                                                                                                                                                                       |
| Lund-Potsdam-Jena General Ecosystem Simulator                               | LPJGUESS                | $I_{sc} = PLif_v$<br>$E_i = E_q\alpha w$ ; $w = \min(I_{sc}/[E_q\alpha], 1)$<br>$I_{sc}$ : canopy interception storage capacity dependent on $P, L$ , rainfall regime storage coefficients ( $i$ ) and vegetative fractional cover ( $f_v$ ); $E_q$ : potentially evaporated water determined via the Priestley-Taylor method (using a maximum coefficient ( $\alpha$ ) of 1);<br>$w$ : daytime canopy wetness duration. |
| Organising Carbon and Hydrology In Dynamic Ecosystems-CNP                   | ORCHIDEE-CNP            | $E_i = \beta_i \rho (q_{sat} - q_a) / r_a$<br>$\beta_i = f_v f_w / (1 + w q_d r_s)$<br>$\beta_i$ : stress factor of interception loss;<br>$f_w$ : wet fraction of canopy; $w$ : wind speed; $q_d$ : surface drag coefficient; $r_s$ : architectural resistance; $\rho$ : air density; $q_{sat}$ : saturated air humidity; $q_a$ : air humidity; $r_a$ : aerodynamic resistance.                                          |
| Surface Externalisée                                                        | SURFEX                  | $E_i = \delta (q_{sat} - q_a) / r_a$<br>$\delta = \min(1, W_r / (0.125 f_v L))$<br>$\partial W_r / \partial t = f_v P - E_r - R_r$<br>$w_r$ : water content of the interception reservoir; $\delta$ : percentage of liquid water on leaves; $E_r$ : interception loss from the canopy reservoir; $R_r$ : drainage rate from the canopy reservoir.                                                                        |

**Supplementary Table 2. List of the 76 FLUXNET sites used in the analysis.** Reported are coordinates (latitude and longitude), plant functional type (PFT, defined by the International Geosphere Biosphere Programme class), maximum leaf area index ( $LAI_{max}$ ), Infra-red gas analyzers (IRGAs, 1: Closed path; 0: Open path), tower height (Tower\_h) and canopy height (Canopy\_h). NA, not available.

| Code   | Latitude | Longitude  | PFT | $LAI_{max}$<br>(unit: $m^2 m^{-2}$ ) | IRGAs | Tower_h<br>(unit: m) | Canopy_h<br>(unit: m) |
|--------|----------|------------|-----|--------------------------------------|-------|----------------------|-----------------------|
| AU-Ade | -13.0769 | 131.1178   | WSA | 2.04                                 | 0     | 21                   | 12.5                  |
| AU-DaS | -14.1593 | 131.3881   | SAV | 1.8768                               | 0     | 21                   | 16.4                  |
| AU-Dry | -15.2588 | 132.3706   | SAV | 1.66                                 | 0     | 15                   | 12.3                  |
| AU-Gin | -31.3764 | 115.7138   | WSA | 1.4076                               | 0     | 15                   | 6.8                   |
| AU-How | -12.4943 | 131.1523   | WSA | 2.4                                  | 0     | 23                   | 16                    |
| AU-RDF | -14.5636 | 132.4776   | WSA | NA                                   | 0     | 21                   | 16                    |
| AU-Rob | -17.1175 | 145.6301   | EBF | NA                                   | 0     | 40                   | 28                    |
| AU-Stp | -17.1507 | 133.3502   | GRA | NA                                   | 0     | 5                    | 1                     |
| AU-Tum | -35.6566 | 148.1517   | EBF | NA                                   | 0     | 70                   | 40.41                 |
| AU-Wac | -37.4259 | 145.1878   | EBF | 5.01                                 | 0     | 95                   | 80                    |
| AU-Wom | -37.4222 | 144.0944   | EBF | 6.4124                               | 0     | 30                   | 22                    |
| BE-Bra | 51.30761 | 4.51984    | MF  | 2.1                                  | 1     | 41                   | 21.22                 |
| BE-Lon | 50.5516  | 4.7461     | CRO | NA                                   | 1     | 3.21                 | 0.48                  |
| BE-Vie | 50.3051  | 5.9981     | MF  | 5.1                                  | 1     | 44.7                 | 33.57                 |
| BR-Sa3 | -3.018   | -54.9714   | EBF | 5.21                                 | 1     | 64                   | 27.5                  |
| CA-Gro | 48.2167  | -82.1556   | MF  | 4.3                                  | 0     | 43.3                 | 31                    |
| CA-Obs | 53.98717 | -105.11779 | ENF | 3.41                                 | 1     | 25                   | 11                    |
| CA-Qfo | 49.6925  | -74.3421   | ENF | 3.7                                  | 1     | 24                   | 13.8                  |
| CA-SF1 | 54.485   | -105.8176  | ENF | 3.4                                  | 0     | 12.1                 | 6                     |
| CH-Dav | 46.8153  | 9.8559     | ENF | 5.5                                  | 1     | 35                   | 25                    |
| CN-Cng | 44.5934  | 123.5092   | GRA | NA                                   | 0     | 2                    | 0.60                  |
| CN-Du2 | 42.0467  | 116.2836   | GRA | NA                                   | 0     | 4                    | 0.43                  |
| CN-Du3 | 42.0551  | 116.2809   | GRA | NA                                   | 0     | 2                    | 0.25                  |

|        |           |            |     |      |   |       |       |
|--------|-----------|------------|-----|------|---|-------|-------|
| CN-HaM | 37.37     | 101.18     | GRA | 2.8  | 0 | 2.2   | 0.3   |
| DE-Geb | 51.1001   | 10.9143    | CRO | NA   | 1 | 3.61  | 0.33  |
| DE-Kli | 50.8931   | 13.5224    | CRO | NA   | 1 | 3.5   | 0.46  |
| DE-Lkb | 49.0996   | 13.3047    | ENF | NA   | 0 | 9     | 2     |
| DE-Obe | 50.7867   | 13.7213    | ENF | NA   | 1 | 30    | 19.64 |
| DE-RuS | 50.86591  | 6.44714    | CRO | NA   | 0 | 2.46  | 0.29  |
| DE-Seh | 50.8706   | 6.4497     | CRO | NA   | 0 | 1.89  | 0.43  |
| DE-Tha | 50.9624   | 13.5652    | ENF | 7.6  | 1 | 42    | 28.21 |
| DK-Fou | 56.4842   | 9.58722    | CRO | NA   | 0 | 2.62  | 0.94  |
| ES-Amo | 36.83361  | -2.25232   | OSH | NA   | 0 | 3.05  | 0.42  |
| ES-LJu | 36.92659  | -2.75212   | OSH | NA   | 0 | 2.5   | 0.5   |
| FI-Hyy | 61.8474   | 24.2948    | ENF | 6.7  | 1 | 32.8  | 14.98 |
| FI-Let | 60.64183  | 23.95952   | ENF | NA   | 1 | 25.7  | 19.03 |
| FR-Gri | 48.8442   | 1.9519     | CRO | NA   | 0 | 3.41  | 0.59  |
| FR-LBr | 44.7171   | -0.7693    | ENF | 3.2  | 1 | 37    | 20.2  |
| GH-Ank | 5.26854   | -2.69421   | EBF | NA   | 1 | 50    | 27    |
| IT-SR2 | 43.73202  | 10.29091   | ENF | NA   | 1 | 24.3  | 19    |
| IT-SRo | 43.7279   | 10.2844    | ENF | NA   | 1 | 22.1  | 18.7  |
| MY-PSO | 2.973     | 102.3062   | EBF | 6.52 | 0 | 54    | 35    |
| NL-Loo | 52.1666   | 5.7436     | ENF | 2.1  | 0 | 26    | 16.99 |
| RU-Cok | 70.82914  | 147.49428  | OSH | 1.5  | 0 | 4.7   | 0.5   |
| RU-Fyo | 56.4615   | 32.9221    | ENF | 3    | 1 | 29    | 25.41 |
| US-AR1 | 36.4267   | -99.42     | GRA | NA   | 0 | 2.84  | 0.5   |
| US-ARb | 35.5497   | -98.0402   | GRA | NA   | 0 | 3.6   | 0.1   |
| US-ARc | 35.54649  | -98.04     | GRA | NA   | 0 | 4.15  | 0.4   |
| US-ARM | 36.6058   | -97.4888   | CRO | NA   | 0 | 3.8   | 0.19  |
| US-Blo | 38.8953   | -120.6328  | ENF | 4.63 | 1 | 10.9  | 2.59  |
| US-CRT | 41.628495 | -83.347086 | CRO | NA   | 0 | 2     | 0.42  |
| US-GBT | 41.36579  | -106.2397  | ENF | 3    | 0 | 27.15 | 11.55 |

|        |          |            |     |      |   |       |       |
|--------|----------|------------|-----|------|---|-------|-------|
| US-GLE | 41.3665  | -106.2399  | ENF | 4.5  | 0 | 22.65 | 9.725 |
| US-Lin | 36.3566  | -119.8423  | CRO | NA   | 1 | 9.18  | 3.7   |
| US-LWW | 34.9604  | -97.9789   | GRA | NA   | 0 | 3     | 0.4   |
| US-Me1 | 44.5794  | -121.5     | ENF | NA   | 0 | 10    | 7.2   |
| US-Me2 | 44.4523  | -121.5574  | ENF | 3.58 | 0 | 33    | 15.66 |
| US-Me4 | 44.4992  | -121.6224  | ENF | 2    | 0 | 47    | 16.5  |
| US-Me5 | 44.43719 | -121.56676 | ENF | 1.1  | 0 | 12    | 4.3   |
| US-Me6 | 44.3233  | -121.6078  | ENF | 1.8  | 0 | 12    | 5.855 |
| US-MMS | 39.3232  | -86.4131   | DBF | 4.62 | 1 | 46    | 26    |
| US-Ne1 | 41.1651  | -96.4766   | CRO | NA   | 1 | 4.54  | 1.59  |
| US-Ne2 | 41.1649  | -96.4701   | CRO | NA   | 1 | 4.51  | 1.13  |
| US-Ne3 | 41.1797  | -96.4397   | CRO | NA   | 1 | 4.48  | 0.97  |
| US-NR1 | 40.0329  | -105.5464  | ENF | 3.65 | 1 | 21.5  | 13.43 |
| US-Prr | 65.12367 | -147.48756 | ENF | 0.73 | 1 | 11    | 2.53  |
| US-Syv | 46.242   | -89.3477   | MF  | 7.53 | 1 | 36    | 27.5  |
| US-Ton | 38.4316  | -120.966   | WSA | 3.28 | 0 | 23.5  | 9.9   |
| US-Tw2 | 38.1047  | -121.6433  | CRO | NA   | 0 | 5.15  | 1.81  |
| US-Tw3 | 38.1159  | -121.6467  | CRO | NA   | 0 | 2.8   | 0.28  |
| US-Twt | 38.10872 | -121.6531  | CRO | NA   | 0 | 3.18  | 0.58  |
| US-WCr | 45.8059  | -90.0799   | DBF | 5.36 | 1 | 29.6  | 24.3  |
| US-Whs | 31.7438  | -110.0522  | OSH | 0.57 | 0 | 4.8   | 1     |
| US-Wi1 | 46.73047 | -91.23294  | DBF | NA   | 0 | 9     | 6     |
| US-Wi3 | 46.63472 | -91.098667 | DBF | 3.9  | 0 | 26    | 20.5  |
| US-Wkg | 31.7365  | -109.9419  | GRA | 0.9  | 0 | 4.8   | 0.5   |

## Supplementary Figures

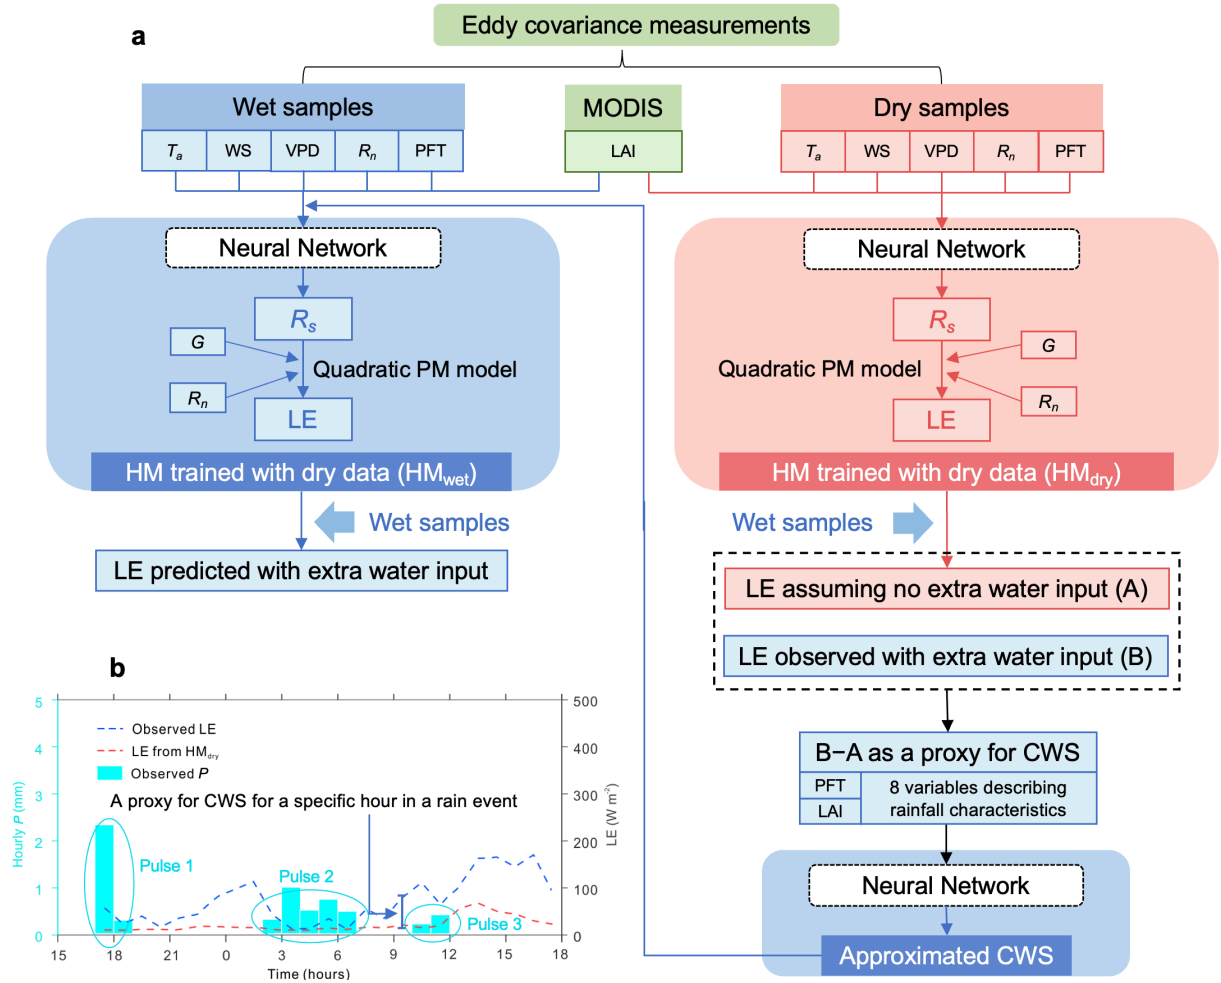

**Supplementary Figure 1. The schematic of isolating rainfall interception loss ( $E_i$ ) from tower-observed latent heat flux (LE).** **a**, Major procedures of  $E_i$  prediction using two hybrid models, as described in “Hybrid model architecture, training and prediction” (Methods). **b**, An example for the characterization of canopy water storage (CWS) during a rain event. Cyan bars show hourly rainfall, which can be separated into individual rainfall pulses by the no-rain intervals. Blue and red curves show the LE observed at flux sites and estimated by hybrid models trained with wet samples ( $HM_{wet}$ ) and dry samples ( $HM_{dry}$ ), respectively. For any specific hour, the difference between the two curves is used as a measure of CWS, which is related to characteristics of the entire event and also of the latest pulse.  $P$  precipitation,  $R_s$  surface resistance, LAI leaf area index,  $R_n$  net solar radiation, VPD vapour pressure deficit, PFT plant functional types,  $G$  ground heat flux.

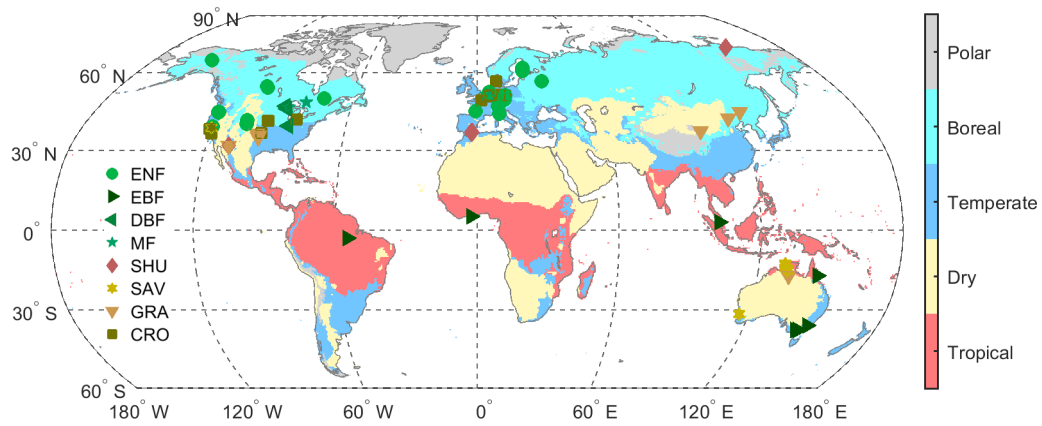

**Supplementary Figure 2. The spatial distribution of the 76 FLUXNET sites used for analysis.** Symbols indicate the eight plant functional types (defined by the International Geosphere Biosphere Programme class) of sites. The background map shows the five major global eco-climatic zones (tropical, dry, temperate, boreal and polar) according to the Köppen–Geiger climate classification. ENF evergreen needleleaf forest, EBF evergreen broadleaf forest, DBF deciduous broadleaf forest, MF mixed forest, SAV savanna, SHU shrubland, GRA grassland, CRO cropland.

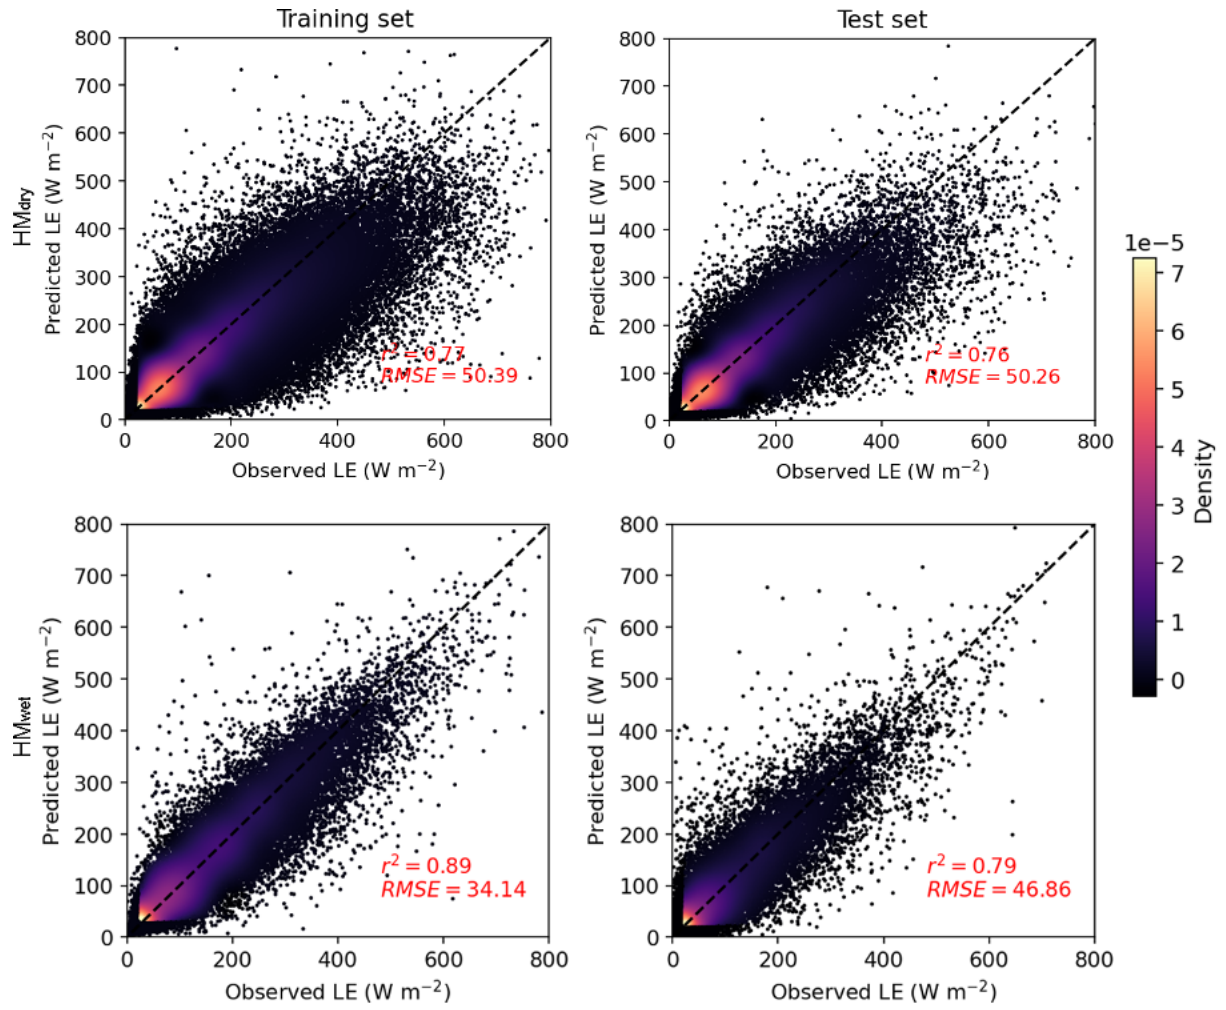

**Supplementary Figure 3. Evaluation of model performance.** Scatterplots of hourly latent heat flux (LE) predicted by hybrid models (y axis) against that observed at the flux sites (x axis). This comparison is conducted for HM<sub>wet</sub> (**a**, **c**) trained with wet samples, and HM<sub>wet</sub> (**b**, **d**) trained with dry samples, respectively. For both models, 80% of site hour samples are used for training, and the rest for test. The black dash lines show the identity line. RMSE root mean square error.



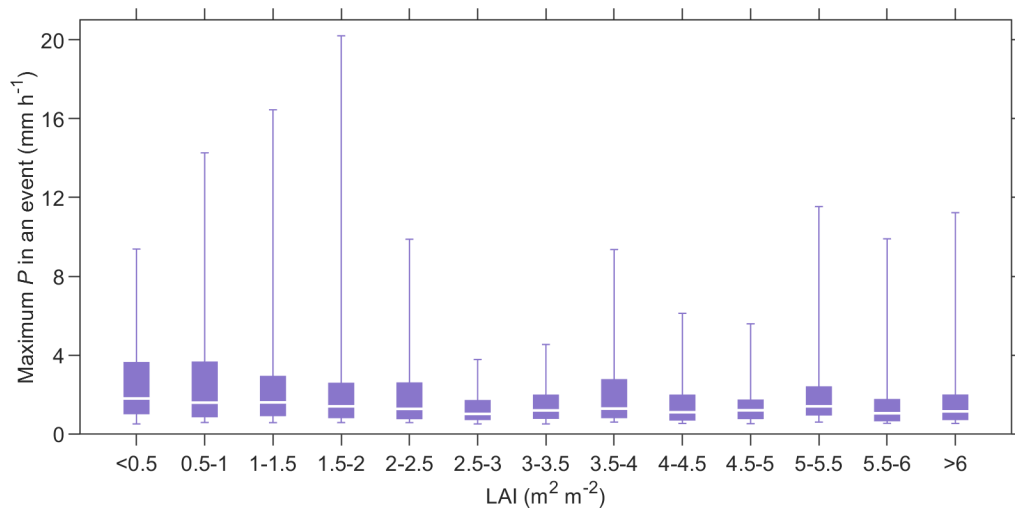

**Supplementary Figure 4. Precipitation ( $P$ ) variability for different levels of leaf area index (LAI).** Boxplot shows the maximum  $P$  rate for all available rain events, across the gradient of LAI binned into  $0.5 \text{ m}^2 \text{m}^{-2}$  intervals. Each box plot shows the median (white line), interquartile range (purple shading), and the 5<sup>th</sup> and 95<sup>th</sup> percentiles (whiskers).

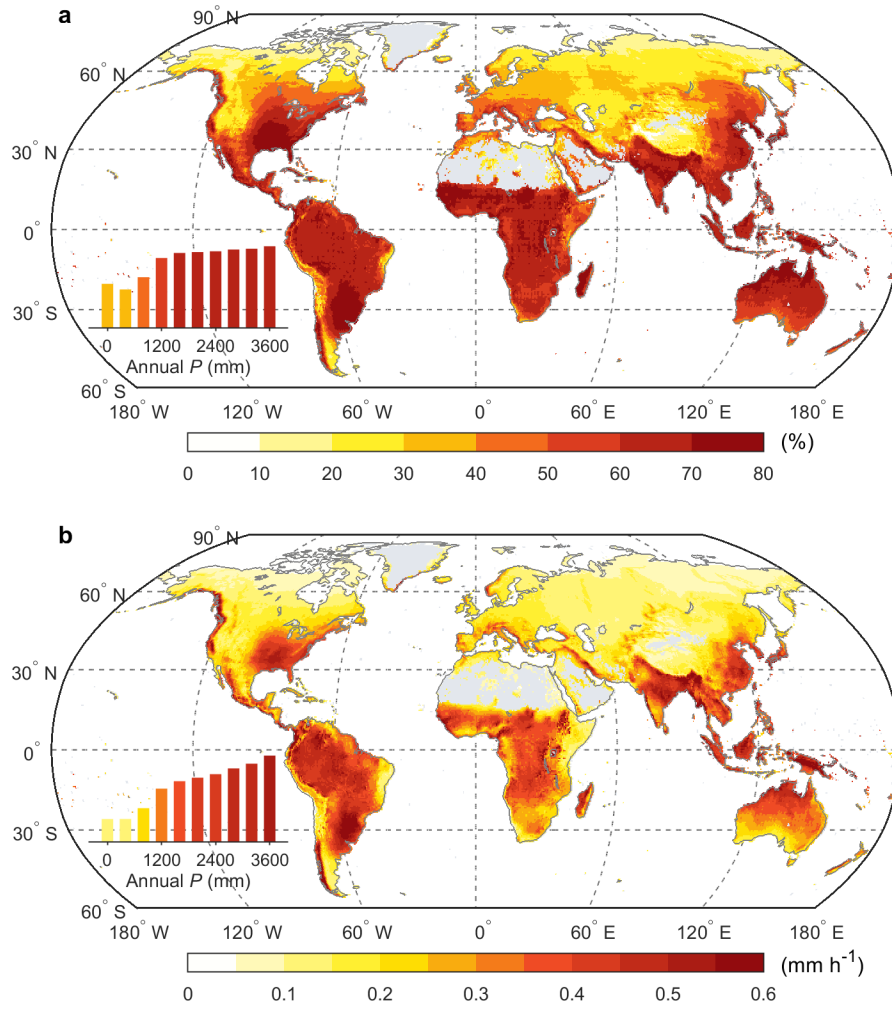

**Supplementary Figure 5. Spatial variations of rainfall ( $P$ ) intensity. **a**, the fraction of annual accumulated  $P$  from intensely raining hours ( $P > 1 \text{ mm h}^{-1}$ ) during 2000–2020. **b**, the average rainfall rates of all raining hours ( $P > 0 \text{ mm h}^{-1}$ ) during 2000–2020. The inset histogram shows the mean value across the average precipitation gradients.**

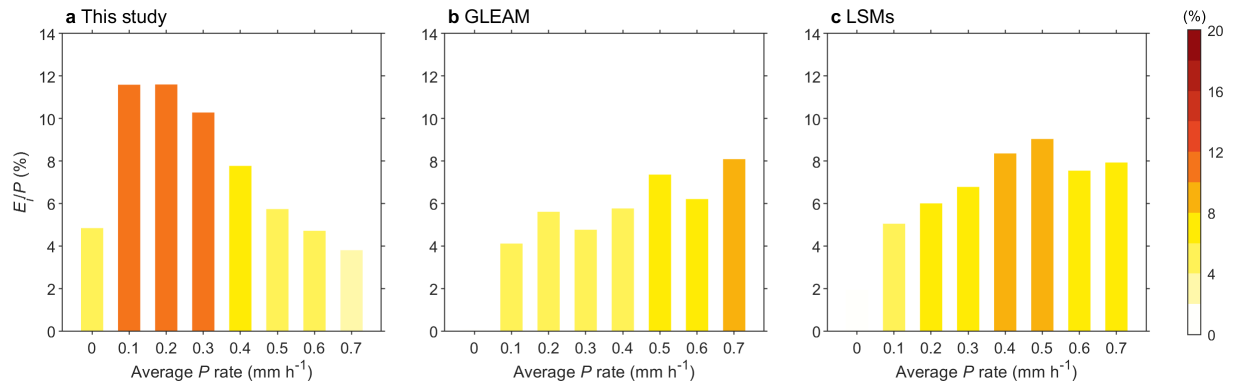

**Supplementary Figure 6. Variations in the fraction of rainfall interception loss ( $E_i/P$ ) across rainfall ( $P$ ) intensity.** The histograms show the destitution of  $E_i/P$  ratio from our data-driven result (a), GLEAM (b) and LSMs (c), across the spatial gradient of average rainfall rate ( $\text{mm h}^{-1}$ , shown in Fig. S8b).

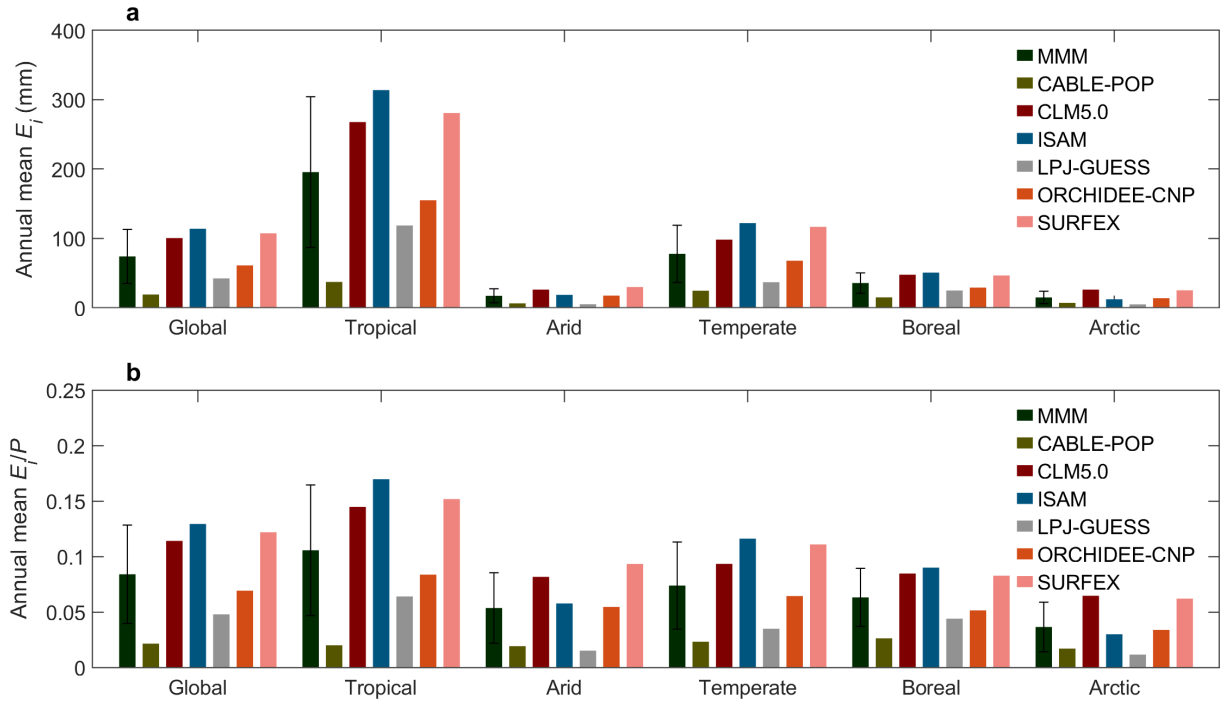

**Supplementary Figure 7. Estimates of annual mean interception evaporation ( $E_i$ ) and its fraction of rainfall ( $E_i/P$ ) from land surface models (LSMs) grouped by climate zones.**

Black bars represent the multi-model mean value, and error bars represent the 1-SD among models. Estimates by each single LSM are in different colors.

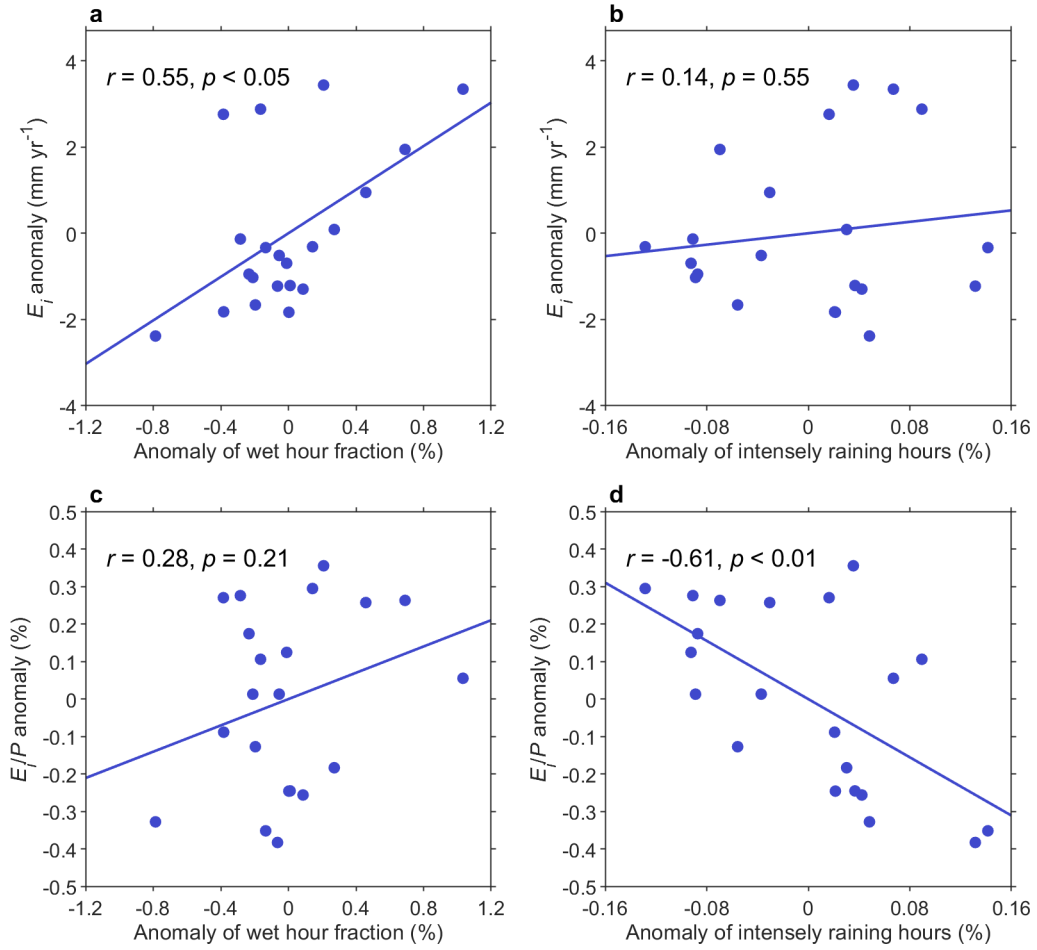

**Supplementary Figure 8. Relationship between interception evaporation,  $E_i$  (or its fraction to total rainfall,  $E_i/P$ ) and rainfall ( $P$ ) characteristics. a, b, Scatterplots of annual mean  $E_i$  against the fraction of wet hours (a) and intensely raining hours (b), respectively. c, d, Scatterplots of annual  $E_i/P$  against the fraction of wet hours (c) and intensely raining hours (d), respectively. In a, the relationship is assessed both for values averaged globally, or for dry and wet regions separately (based on definitions using aridity index). All variables use inter-annual anomalies by subtracting the corresponding average during 2000–2020. Black lines show the best-fit regression. Labels show the Pearson correlation and its significance.**

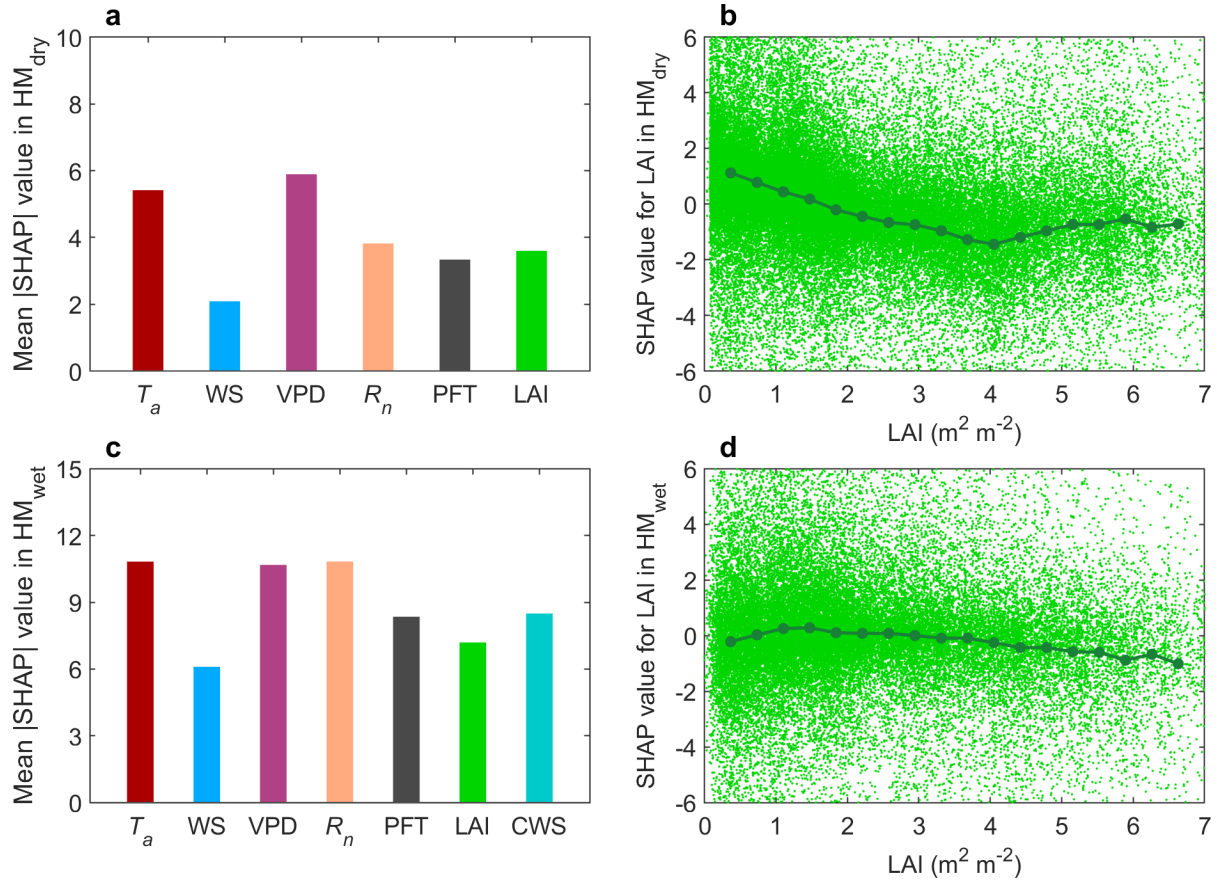

**Supplementary Figure 9. Dependence of surface resistance ( $R_s$ ) on predictors in hybrid models.** **a, c**, the relative importance of predictors for variations of  $R_s$  in hybrid models trained with wet samples ( $HM_{wet}$ ) and dry samples ( $HM_{dry}$ ), respectively. The variable importance is assessed with the mean |SHAP| (SHapley Additive exPlanations) value. **b, d**, partial dependence plots of the SHAP value against LAI from  $HM_{dry}$  and  $HM_{wet}$ , respectively, where the dark green curve represents the median value along gradients of leaf area index (LAI). Note that  $R_s$ , instead of latent heat (LE), is presented here because  $R_s$  is the target directly simulated by the built-in NN of the hybrid model. The decreasing  $R_s$  along LAI in **b** and **d** indicate increasing LE along LAI gradients since  $R_s$  and LE are inversely related.

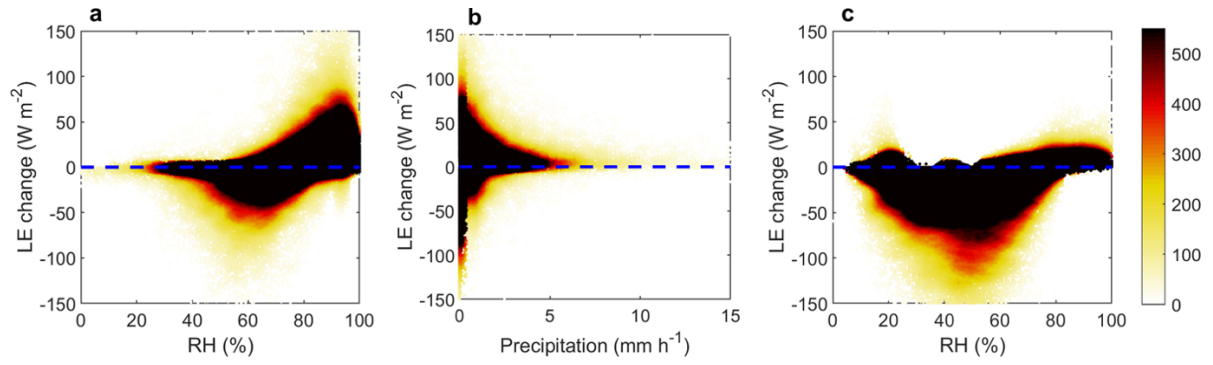

**Supplementary Figure 10. Changes of hourly latent heat flux (LE) by correcting for an artificial dependence on relative humidity (RH) and rainfall.** Heatmaps show the LE changes along the gradients of RH and precipitation amount. The shading shows the density of site-hour samples. The LE changes indicate the difference between the hypothesized LE under conditions of moderate RH (50%) and no rain (predicted via a neural network; Methods) and the original LE. **a** and **b** show the results for wet-hour LE, and **c** shows that for dry-hour LE.

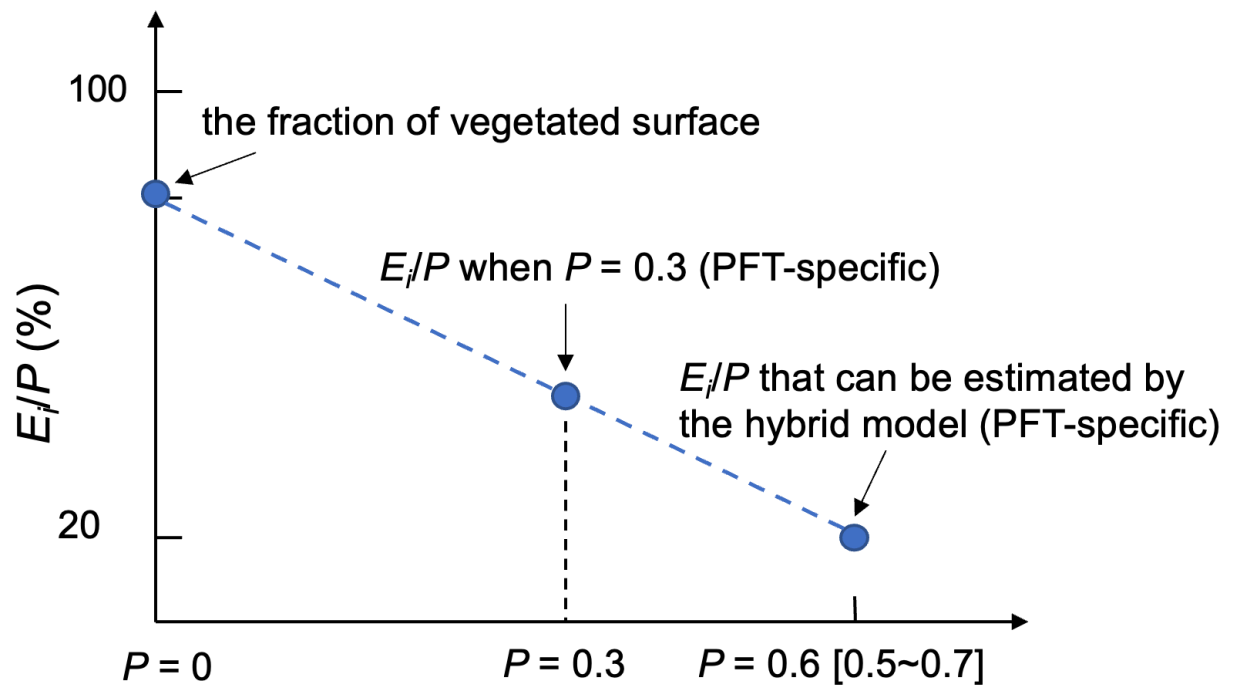

**Supplementary Figure 11. Schematic of estimating the fraction of rainfall interception loss ( $E_i/P$ ) in light rain (with hourly rainfall  $P < 0.5 \text{ mm h}^{-1}$ ) conditions.** In brief, for a specific rain rate within 0 and 0.5  $\text{mm h}^{-1}$ , we linearly interpolated the  $E_i/P$  ratio based on the information known for 0 and 0.6  $\text{mm h}^{-1}$  (Details in “Global  $E_i$  mapping driven by satellite and reanalysis data”).
